# Supplementary material for: Protective Yeasts Control V. anguillarum Pathogenicity and Modulate the Innate Immune Response of Challenged Zebrafish (Danio rerio) Larvae
Source: PubMed Central journal article supplement (PMC5063852; doi:10.3389/fcimb.2016.00127), 2016-10-14
Supplement: Image2.pdf [file Image2.pdf]

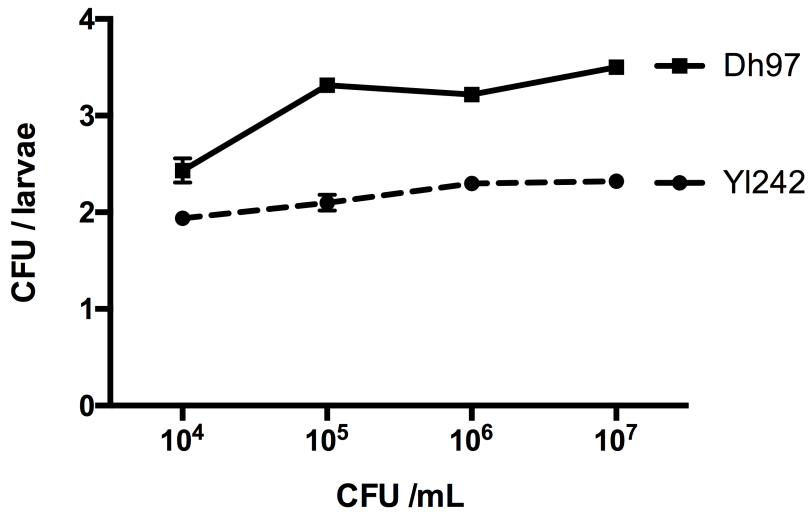

**Figure S2. Initial concentration of yeasts at 4 days post fertilization (dpf) after 2h immersion with yeasts *Debaryomyces hansenii* (Dh97) and *Yarrowia lipolytica* (Y1242).** Dh97 reached higher concentrations in larvae than Y1242 ( $P < 0.05$ , unpaired t test). The two yeasts showed a positive correlation between yeast inoculum and yeast concentration in larvae ( $r = 0.9203$ ,  $P < 0.0001$  for Dh97; and  $r = 0.7778$ ,  $P < 0.001$  for Y1242, Spearman correlation test).
